# Supplementary material for: Genotype-Specific Changes in Vitamin B6Content and the PDX Family in Potato
Source: Hindawi journal article supplement (doi:10.1155/2013/389723), 2013-01-01
Supplement: f2 [file 389723.f2.pdf]

Supplementary Figure 1

| bait \ prey                            |  | pBTM:empty                                                                         | pBTM:AtPDX1.3                                                                       |                                                                                     |
|----------------------------------------|--|------------------------------------------------------------------------------------|-------------------------------------------------------------------------------------|-------------------------------------------------------------------------------------|
|                                        |  | SDII / SDIV                                                                        | SDII / SDIV                                                                         | SDII / SDIV                                                                         |
| <i>PGSC0003DM</i><br><i>T400041662</i> |  | 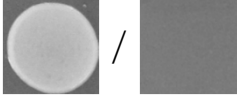 |  |  |
| <i>PGSC0003DM</i><br><i>T400006347</i> |  |  |  |  |

| bait \ prey                            |  | pBTM:empty                                                                           | pBTM:AtPDX2                                                                           |                                                                                       |
|----------------------------------------|--|--------------------------------------------------------------------------------------|---------------------------------------------------------------------------------------|---------------------------------------------------------------------------------------|
|                                        |  | SDII / SDIV                                                                          | SDII / SDIV                                                                           | SDII / SDIV                                                                           |
| <i>PGSC0003DM</i><br><i>T400046928</i> |  | 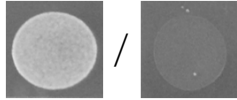   |    |    |
| <i>PGSC0003DM</i><br><i>T400036050</i> |  |  |  |  |
