# Supplementary material for: Genotype-Specific Changes in Vitamin B6Content and the PDX Family in Potato
Source: Hindawi journal article supplement (doi:10.1155/2013/389723), 2013-01-01

Supplementary Figure 2

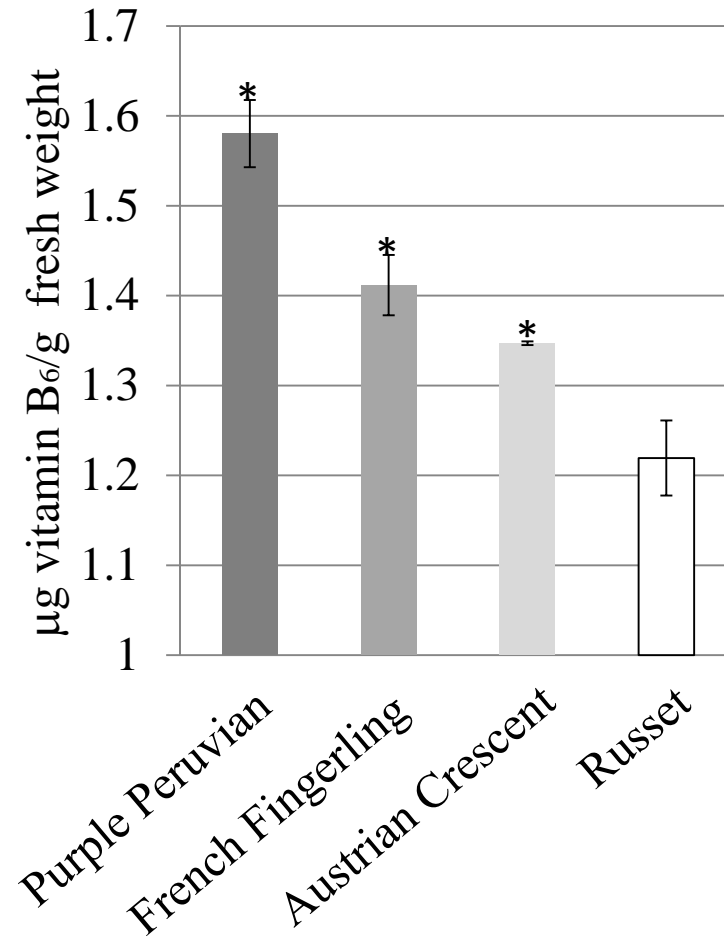

Supplement: f3 [file 389723.f3.pdf]
